# Supplementary material for: A nomogram combining clinical features, O-RADS US, and radiomics based on ultrasound imaging for diagnosing ovarian cancer
Source: Research Square preprint supplement (doi:10.21203/rs.3.rs-5468347/v1), 2025-03-31
Supplement: Supplementary file 1 [file 1bdf44589fdfca8c2e37db5f.docx]

Supplementary Table 3 Results of the univariate and multivariate analyses of Radscore+Clinical model based on the training set.

| Characteristic | Univariate analysis | |  | Multivariate analysis | |
| --- | --- | --- | --- | --- | --- |
|  | OR (95% CI) | *p* value |  | OR (95% CI) | *p* value |
| Age, years | 1.057(1.043,1.07) | ＜0.001 |  | 1.058(1.035,1.084) | ＜0.001 |
| Tumor size,mm | 1.008(1.005,1.011) | ＜0.001 |  |  |  |
| CA125（U/ml） | 1.005(1.004,1.007) | ＜0.001 |  | 1.002(1.001,1.003) | 0.0031 |
| Location |  |  |  |  |  |
| Left | 0.689(0.508,0.934) | 0.0168 |  | 0.262(0.104,0.650) | 0.0040 |
| Right | 0.535(0.391,0.73) | ＜0.001 |  | 0.229(0.088,0.583) | 0.0021 |
| Bilateral | 5.473(3.520,8.774) | ＜0.001 |  |  |  |
| Ascites | 11.225(7.065,18.623) | ＜0.001 |  | 3.451(1.450,8.453) | 0.0057 |
| Radscore | 1.77(1.619,1.955) | ＜0.001 |  | 4.362(1.648,11.855) | ＜0.001 |
