# Supplementary material for: A nomogram combining clinical features, O-RADS US, and radiomics based on ultrasound imaging for diagnosing ovarian cancer
Source: Research Square preprint supplement (doi:10.21203/rs.3.rs-5468347/v1), 2025-03-31
Supplement: Supplementary file 2 [file 696fa9bc5310973b194a11e5.docx]

Supplementary Table 4 Results of the univariate and multivariate analyses of O-RADS+Clinical model based on the training set.

| Characteristic | Univariate analysis | |  | Multivariate analysis | |
| --- | --- | --- | --- | --- | --- |
|  | OR (95% CI) | *p* value |  | OR (95% CI) | *p* value |
| Age, years | 1.057(1.043,1.07) | ＜0.001 |  | 1.022(1.003,1.042) | 0.0230 |
| Tumor size,mm | 1.008(1.005,1.011) | ＜0.001 |  |  |  |
| CA125（U/ml） | 1.005(1.004,1.007) | ＜0.001 |  | 1.001(1.001,1.003) | 0.0051 |
| Location |  |  |  |  |  |
| Left | 0.689(0.508,0.934) | 0.0168 |  |  |  |
| Right | 0.535(0.391,0.73) | ＜0.001 |  |  |  |
| Bilateral | 5.473(3.520,8.774) | ＜0.001 |  |  |  |
| Ascites | 11.225(7.065,18.623) | ＜0.001 |  |  |  |
| O-RADS | 18.7 (12.4,30.0) | ＜0.001 |  | 13.52 (8.782,22.19) | ＜0.001 |
