# Supplementary material for: A nomogram combining clinical features, O-RADS US, and radiomics based on ultrasound imaging for diagnosing ovarian cancer
Source: Research Square preprint supplement (doi:10.21203/rs.3.rs-5468347/v1), 2025-03-31
Supplement: Supplementary file 3 [file a87537059b56f9bd19ae0c15.docx]

Supplementary Table 1 The radiomic features of ovarian neoplasm.

| Radiomic features | Number |
| --- | --- |
| First Order Statistics | 18 |
| Shape-based | 14 |
| Gray Level Cooccurence Matrix, GLCM | 24 |
| Gray Level Dependence Matrix, GLDM | 14 |
| Gray Level Run Length Matrix, GLRLM | 16 |
| Gray Level Size Zone Matrix, GLSZM | 16 |
| Neighbouring Gray Tone Difference Matrix, NGTDM | 5 |
| wavelet | 687 |
