# Supplementary material for: A nomogram combining clinical features, O-RADS US, and radiomics based on ultrasound imaging for diagnosing ovarian cancer
Source: Research Square preprint supplement (doi:10.21203/rs.3.rs-5468347/v1), 2025-03-31
Supplement: Supplementary file 4 [file d622e9ad414be783b8248ea2.docx]

Supplementary Table 2 Clinicopathological characteristics in patients with two centers.

| Characteristic | FJZL(n=749) | NPFH(n = 232) |
| --- | --- | --- |
| Age,years (Q.25-Q.75) | 49(41-58) | 38(28-53) |
| Tumor size, mm (Q.25-Q.75) | 93(60-132) | 72(55-104) |
| CA125,U/ml (Q.25-Q.75) | 78(18-575) | 20.6(11.4-45.9) |
| Location |  |  |
| Left | 322(43.0) | 102(44.0) |
| Right | 271(36.2) | 100(43.1) |
| Bilateral | 156(20.8) | 30(12.9) |
| Ascites |  |  |
| Yes | 219(29.2) | 15(6.5) |
| No | 530(70.8) | 217(93.5) |
| O-RADS |  |  |
| 2 | 64(8.5) | 138(59.5) |
| 3 | 148(19.8) | 52(22.4) |
| 4 | 205(27.4) | 28(12.1) |
| 5 | 332(44.3) | 14(6.0) |
| Pathological |  |  |
| Benign | 289(38.6) | 210(90.5) |
| Malignant | 460(61.4) | 22(9.5) |

FJZL: Fujian Cancer Hospital; NPFH: Nanping First Hospital Affiliated to Fujian Medical University.
